# Supplementary material
Source: MDPI journal article supplement (https://www.mdpi.com/2073-4395/13/7/1913)
Supplement: s1 [file s1]

# Nitrogen, Phosphorous, and Potassium Uptake in Rain-fed Corn as affected by NPK Fertilization

**Table S1.** The least square means of nutrient concentrations at early growth stage (V6/V7), physiological maturity (R6), and grain. Corn plants were separated into stover (stalk + leaves) and ear (cob + husk) at R6 stage. Grain samples were collected during harvesting.

| Site-year | Treatment                         | Nitrogen (g kg <sup>-1</sup> ) |              |  |           |  |           |  |
|-----------|-----------------------------------|--------------------------------|--------------|--|-----------|--|-----------|--|
|           |                                   | Plant component                |              |  |           |  |           |  |
|           |                                   | V6<br>(Whole plant)            | R6<br>Stover |  | R6<br>Ear |  | Grain     |  |
| EFAW21    | N0P0K0                            | 19.72 b                        | 4.62 ab      |  | 9.10 bcd  |  | 10.07 def |  |
|           | N0P0K1                            | 19.81 b                        | 3.02 b       |  | 8.81 cd   |  | 9.53 ef   |  |
|           | N0P1K0                            | 20.52 ab                       | 4.18 ab      |  | 8.39 d    |  | 9.32 f    |  |
|           | N0P1K1                            | 21.37 ab                       | 4.26 ab      |  | 8.48 d    |  | 9.32 f    |  |
|           | N1P0K0                            | 23.66 ab                       | 4.71 ab      |  | 8.71 cd   |  | 11.16 cde |  |
|           | N1P0K1                            | 23.85 ab                       | 4.66 ab      |  | 9.62 abcd |  | 11.41 bcd |  |
|           | N1P1K0                            | 24.89 ab                       | 4.68 ab      |  | 9.16 abcd |  | 11.19 cde |  |
|           | N1P1K1                            | 26.11 ab                       | 5.25 ab      |  | 9.41 abcd |  | 10.66 def |  |
|           | N2P0K0                            | 26.55 ab                       | 5.86 a       |  | 10.33 abc |  | 12.89 ab  |  |
|           | N2P0K1                            | 27.82 a                        | 5.86 a       |  | 10.28 abc |  | 13.09 ab  |  |
|           | N2P1K0                            | 24.91 ab                       | 5.93 a       |  | 10.69 ab  |  | 13.27 a   |  |
|           | N2P1K1                            | 26.73 ab                       | 5.92 a       |  | 10.81 a   |  | 12.74 abc |  |
|           | S.E.                              | 1.8                            | 0.53         |  | 0.33      |  | 0.32      |  |
|           | Phosphorous (g kg <sup>-1</sup> ) |                                |              |  |           |  |           |  |
|           | N0P0K0                            | 2.54                           | 0.65         |  | 2.55      |  | 2.91      |  |
|           | N0P0K1                            | 2.69                           | 0.56         |  | 2.42      |  | 2.62      |  |
|           | N0P1K0                            | 2.55                           | 0.41         |  | 2.14      |  | 2.62      |  |
|           | N0P1K1                            | 2.82                           | 0.43         |  | 2.19      |  | 2.80      |  |
|           | N1P0K0                            | 2.62                           | 0.45         |  | 1.98      |  | 2.53      |  |
|           | N1P0K1                            | 2.75                           | 0.49         |  | 2.46      |  | 2.62      |  |
|           | N1P1K0                            | 2.64                           | 0.45         |  | 2.27      |  | 2.42      |  |
|           | N1P1K1                            | 2.66                           | 0.44         |  | 1.94      |  | 2.39      |  |
|           | N2P0K0                            | 2.73                           | 0.44         |  | 2.23      |  | 2.34      |  |
|           | N2P0K1                            | 2.61                           | 0.38         |  | 1.89      |  | 2.22      |  |
|           | N2P1K0                            | 2.49                           | 0.37         |  | 2.40      |  | 2.70      |  |
|           | N2P1K1                            | 2.88                           | 0.50         |  | 2.31      |  | 2.93      |  |
|           | S.E.                              | 0.16                           | 0.07         |  | 0.20      |  | 0.16      |  |
|           | Potassium (g kg <sup>-1</sup> )   |                                |              |  |           |  |           |  |
|           | N0P0K0                            | 43.47                          | 14.40        |  | 5.45      |  | 4.31      |  |
|           | N0P0K1                            | 46.79                          | 16.90        |  | 4.94      |  | 4.22      |  |
|           | N0P1K0                            | 39.90                          | 13.97        |  | 4.70      |  | 4.05      |  |
|           | N0P1K1                            | 49.18                          | 16.27        |  | 4.70      |  | 4.24      |  |
|           | N1P0K0                            | 46.46                          | 15.72        |  | 4.54      |  | 3.99      |  |
|           | N1P0K1                            | 49.24                          | 17.39        |  | 5.02      |  | 4.03      |  |
|           | N1P1K0                            | 42.66                          | 14.89        |  | 5.07      |  | 3.88      |  |
|           | N1P1K1                            | 46.36                          | 17.16        |  | 4.45      |  | 3.97      |  |
|           | N2P0K0                            | 45.33                          | 15.81        |  | 4.74      |  | 3.78      |  |
|           | N2P0K1                            | 47.72                          | 16.50        |  | 4.59      |  | 3.78      |  |
|           | N2P1K0                            | 42.36                          | 15.54        |  | 4.51      |  | 4.13      |  |
|           | N2P1K1                            | 52.46                          | 17.49        |  | 4.47      |  | 4.23      |  |
|           | S.E.                              | 3.49                           | 0.98         |  | 0.24      |  | 0.16      |  |

**Table S1.** Continued

| Site-year | Treatment                         | Nitrogen (g kg <sup>-1</sup> ) |        |     |       |       |     |
|-----------|-----------------------------------|--------------------------------|--------|-----|-------|-------|-----|
|           |                                   | -----Plant components-----     |        |     |       |       |     |
|           |                                   | V6                             | R6     |     |       | Grain |     |
|           |                                   | (Whole plant)                  | Stover |     | Ear   |       |     |
| LCB22     | N0P0K0                            | 26.32 bcd                      | 5.54   | ab  | 8.79  | 9.90  | bc  |
|           | N0P0K1                            | 24.66 d                        | 5.71   | ab  | 9.73  | 9.43  | c   |
|           | N0P1K0                            | 24.51 d                        | 5.21   | b   | 9.82  | 10.20 | bc  |
|           | N0P1K1                            | 23.74 d                        | 5.68   | ab  | 11.43 | 9.78  | bc  |
|           | N1P0K0                            | 27.07 abcd                     | 4.54   | b   | 9.09  | 11.73 | abc |
|           | N1P0K1                            | 27.59 abcd                     | 7.88   | ab  | 11.30 | 12.73 | ab  |
|           | N1P1K0                            | 25.15 cd                       | 5.58   | ab  | 10.07 | 12.04 | abc |
|           | N1P1K1                            | 28.79 abcd                     | 5.32   | ab  | 9.76  | 11.76 | abc |
|           | N2P0K0                            | 29.88 abc                      | 8.99   | a   | 10.86 | 13.47 | a   |
|           | N2P0K1                            | 30.94 ab                       | 7.47   | ab  | 10.81 | 12.87 | a   |
|           | N2P1K0                            | 31.95 a                        | 7.39   | ab  | 11.14 | 13.23 | a   |
|           | N2P1K1                            | 31.12 ab                       | 6.01   | ab  | 10.40 | 14.00 | a   |
|           | S.E.                              | 1.0                            | 0.76   |     | 0.92  | 0.51  |     |
|           | Phosphorous (g kg <sup>-1</sup> ) |                                |        |     |       |       |     |
|           | N0P0K0                            | 4.30 ab                        | 2.25   | ab  | 2.69  | 3.39  |     |
|           | N0P0K1                            | 4.97 a                         | 2.48   | ab  | 2.92  | 2.87  |     |
|           | N0P1K0                            | 4.81 ab                        | 2.59   | a   | 2.91  | 2.95  |     |
|           | N0P1K1                            | 4.73 ab                        | 2.21   | ab  | 2.95  | 3.37  |     |
|           | N1P0K0                            | 4.22 ab                        | 1.74   | abc | 2.66  | 3.47  |     |
|           | N1P0K1                            | 4.50 ab                        | 1.87   | abc | 3.32  | 3.32  |     |
|           | N1P1K0                            | 3.98 b                         | 1.82   | abc | 3.10  | 3.57  |     |
|           | N1P1K1                            | 4.20 ab                        | 1.98   | abc | 2.75  | 3.60  |     |
|           | N2P0K0                            | 4.24 ab                        | 0.83   | c   | 2.78  | 3.60  |     |
|           | N2P0K1                            | 4.36 ab                        | 1.26   | bc  | 2.85  | 3.70  |     |
|           | N2P1K0                            | 3.89 b                         | 1.24   | bc  | 2.93  | 3.89  |     |
|           | N2P1K1                            | 4.42 ab                        | 0.83   | c   | 2.98  | 3.83  |     |
|           | S.E.                              | 0.21                           | 0.26   |     | 0.24  | 0.24  |     |
|           | Potassium (g kg <sup>-1</sup> )   |                                |        |     |       |       |     |
|           | N0P0K0                            | 44.28 ab                       | 10.90  |     | 8.22  | 6.40  |     |
|           | N0P0K1                            | 50.52 a                        | 10.59  |     | 8.29  | 5.37  |     |
|           | N0P1K0                            | 45.61 ab                       | 10.55  |     | 6.59  | 5.33  |     |
|           | N0P1K1                            | 45.01 ab                       | 9.78   |     | 8.51  | 6.17  |     |
|           | N1P0K0                            | 39.76 ab                       | 9.66   |     | 6.84  | 5.22  |     |
|           | N1P0K1                            | 46.45 ab                       | 12.51  |     | 7.20  | 5.27  |     |
|           | N1P1K0                            | 38.97 ab                       | 10.29  |     | 7.32  | 5.82  |     |
|           | N1P1K1                            | 45.06 ab                       | 10.57  |     | 6.71  | 5.56  |     |
|           | N2P0K0                            | 41.43 ab                       | 8.63   |     | 5.61  | 5.70  |     |
|           | N2P0K1                            | 41.08 ab                       | 9.47   |     | 5.79  | 5.90  |     |
|           | N2P1K0                            | 33.60 b                        | 9.27   |     | 5.55  | 6.30  |     |
|           | N2P1K1                            | 43.50 ab                       | 9.04   |     | 6.28  | 6.00  |     |
|           | S.E.                              | 2.6                            | 1.2    |     | 0.76  | 0.37  |     |

Values represent the mean of three replications. Different letter within each column denotes the significant difference at  $P < 0.05$  by *Tukey test*. Columns with no letter indicates that there was no significant difference observed among treatments.

**Table S2.** Analysis of Variance for interaction effects and main effects of N, P, and K for total aboveground biomass accumulation, N, P, and K uptake at V6/V7 growth stage.

| Site-year    | Source of Variation | df | Biomass (kg ha <sup>-1</sup> ) | N uptake (kg ha <sup>-1</sup> ) | P uptake (kg ha <sup>-1</sup> ) | K uptake (kg ha <sup>-1</sup> ) |
|--------------|---------------------|----|--------------------------------|---------------------------------|---------------------------------|---------------------------------|
| Mean Squares |                     |    |                                |                                 |                                 |                                 |
| EFAW<br>21   | N                   | 2  | ns                             | ***                             | ns                              | ns                              |
|              | P                   | 1  | ns                             | ns                              | ns                              | ns                              |
|              | N x P               | 2  | ns                             | ns                              | ns                              | ns                              |
|              | K                   | 1  | *                              | ns                              | ns                              | ns                              |
|              | N x K               | 2  | ns                             | ns                              | ns                              | ns                              |
|              | P x K               | 1  | ns                             | ns                              | ns                              | ns                              |
|              | N x P x K           | 2  | ns                             | ns                              | ns                              | ns                              |
|              | S.E.                |    | 158.18                         | 3.86                            | 0.43                            | 8.13                            |
|              | Treatment           |    | Means                          |                                 |                                 |                                 |
|              | N0P0K0              |    | 1269.9                         | 24.8ab                          | 3.2                             | 55.5                            |
|              | N0P0K1              |    | 1150.1                         | 22.2b                           | 3.0                             | 52.8                            |
|              | N0P1K0              |    | 1293.8                         | 26.5ab                          | 3.3                             | 51.9                            |
|              | N0P1K1              |    | 1138.1                         | 24.1ab                          | 3.3                             | 57.6                            |
|              | N1P0K0              |    | 1629.3                         | 38.1ab                          | 4.3                             | 75.2                            |
|              | N1P0K1              |    | 1509.5                         | 33.9ab                          | 4.0                             | 72.4                            |
| LCB<br>22    | N1P1K0              |    | 1269.9                         | 31.3ab                          | 3.4                             | 54.7                            |
|              | N1P1K1              |    | 1245.9                         | 31.4ab                          | 3.3                             | 56.5                            |
|              | N2P0K0              |    | 1629.3                         | 43.3a                           | 4.4                             | 72.6                            |
|              | N2P0K1              |    | 1305.8                         | 36.5ab                          | 3.4                             | 62.2                            |
|              | N2P1K0              |    | 1665.2                         | 41.6ab                          | 4.2                             | 70.7                            |
|              | N2P1K1              |    | 1233.9                         | 32.3ab                          | 3.6                             | 65.2                            |
|              | S.E.                |    | 77.09                          | 2.28                            | 0.31                            | 3.06                            |
|              | Treatments          |    |                                |                                 |                                 |                                 |
|              | N0P0K0              |    | 307.6 c                        | 8.1 c                           | 1.33 c                          | 13.62 d                         |
|              | N0P0K1              |    | 439.4 bc                       | 10.8 bc                         | 2.19 bc                         | 22.19 bcd                       |
|              | N0P1K0              |    | 463.3 bc                       | 11.3 bc                         | 2.17 bc                         | 20.66 bcd                       |
|              | N0P1K1              |    | 439.4 bc                       | 10.4 bc                         | 2.08 bc                         | 19.69 cd                        |
|              | N1P0K0              |    | 738.9 ab                       | 20.0 ab                         | 3.11 ab                         | 29.43 abc                       |
|              | N1P0K1              |    | 774.8 ab                       | 21.4 ab                         | 3.48 ab                         | 35.91 ab                        |
|              | N1P1K0              |    | 798.8 ab                       | 20.0 ab                         | 3.17 ab                         | 30.90 abc                       |
|              | N1P1K1              |    | 846.7 a                        | 24.6 a                          | 3.56 ab                         | 37.98 a                         |
|              | N2P0K0              |    | 810.7 ab                       | 24.0 a                          | 3.40 ab                         | 33.10 abc                       |
|              | N2P0K1              |    | 1014.4 a                       | 31.4 a                          | 4.43 a                          | 41.80 a                         |
|              | N2P1K0              |    | 918.6 a                        | 29.4 a                          | 3.58 ab                         | 30.97 abc                       |
|              | N2P1K1              |    | 786.8 ab                       | 24.6 a                          | 3.46 ab                         | 33.98 abc                       |

\*, \*\*, and \*\*\* are significant at the 0.05, 0.01, and 0.001 levels respectively. ns: not significant at the 0.05 level. Treatment means values represent the mean of three replications. Different letter within each column denotes the significant difference at  $P < 0.05$  by Tukey test

**Table S3.** The least square means of Grain nitrogen harvest index (GNHI), grain phosphorous harvest index (GPHI), and grain potassium harvest index (GKHI) by site year.

| Site year | Treatments | GNHI    | GPHI     | GKHI      |
|-----------|------------|---------|----------|-----------|
| EFAW21    |            |         | Means    |           |
|           | N0P0K0     | 0.72 b  | 0.85     | 0.30      |
|           | N0P0K1     | 0.78 ab | 0.77     | 0.24      |
|           | N0P1K0     | 0.75 ab | 0.95     | 0.29      |
|           | N0P1K1     | 0.77 ab | 1.01     | 0.30      |
|           | N1P0K0     | 0.94 a  | 1.06     | 0.37      |
|           | N1P0K1     | 0.8 ab  | 0.91     | 0.27      |
|           | N1P1K0     | 0.82 ab | 0.85     | 0.30      |
|           | N1P1K1     | 0.82 ab | 1.02     | 0.34      |
|           | N2P0K0     | 0.81 ab | 0.86     | 0.30      |
|           | N2P0K1     | 0.83 ab | 0.95     | 0.31      |
|           | N2P1K0     | 0.84 ab | 0.92     | 0.36      |
|           | N2P1K1     | 0.83 ab | 1.07     | 0.36      |
| LCB22     |            |         | Means    |           |
|           | N0P0K0     | 0.22 b  | 0.21 c   | 0.09 d    |
|           | N0P0K1     | 0.34 b  | 0.31 c   | 0.15 cd   |
|           | N0P1K0     | 0.54 ab | 0.46 bc  | 0.26 abcd |
|           | N0P1K1     | 0.54 ab | 0.51 bc  | 0.24 abcd |
|           | N1P0K0     | 0.86 a  | 0.81 abc | 0.32 abcd |
|           | N1P0K1     | 0.75 ab | 0.87 abc | 0.30 abcd |
|           | N1P1K0     | 0.85 a  | 0.72 abc | 0.32 abcd |
|           | N1P1K1     | 0.93 a  | 0.81 abc | 0.31 abcd |
|           | N2P0K0     | 0.85 a  | 1.22 a   | 0.48 a    |
|           | N2P0K1     | 0.86 a  | 1.09 ab  | 0.46 a    |
|           | N2P1K0     | 0.70 ab | 0.75 abc | 0.40 abc  |
|           | N2P1K1     | 0.89 a  | 1.02 ab  | 0.41 ab   |

Different letters within each column denotes the significant difference at  $P < 0.05$  by Tukey test

**Table S4.** Least square means for nutrient uptake per plant at different growth stages during the entire crop season at EFAW21

| Treatment | Nitrogen (mg pl <sup>-1</sup> ) |    |        |    |        |      |        |     |
|-----------|---------------------------------|----|--------|----|--------|------|--------|-----|
|           | Growth Stage                    |    |        |    |        |      |        |     |
|           | V6                              |    | VT     |    | R2     |      | R6     |     |
| N0P0K0    | 576.0                           | ab | 842.8  | b  | 990.1  | cd   | 1785.4 | f   |
| N0P0K1    | 515.2                           | b  | 890.6  | b  | 1020.2 | bcd  | 1590.6 | f   |
| N0P1K0    | 615.1                           | ab | 798.3  | b  | 1035.8 | bcd  | 1616.1 | f   |
| N0P1K1    | 559.3                           | ab | 765.6  | b  | 924.0  | d    | 1957.0 | ef  |
| N1P0K0    | 883.2                           | ab | 1074.2 | ab | 1286.2 | abcd | 2606.2 | de  |
| N1P0K1    | 786.3                           | ab | 1318.9 | ab | 1595.0 | abcd | 3158.0 | bcd |
| N1P1K0    | 726.0                           | ab | 1230.8 | ab | 1526.2 | abcd | 2692.0 | d   |
| N1P1K1    | 729.0                           | ab | 1254.2 | ab | 1520.6 | abcd | 2833.4 | cd  |
| N2P0K0    | 1003.5                          | a  | 1643.0 | a  | 1966.2 | a    | 3545.3 | abc |
| N2P0K1    | 847.0                           | ab | 1366.2 | ab | 1678.0 | abcd | 3668.2 | ab  |
| N2P1K0    | 963.4                           | ab | 1397.2 | ab | 1799.3 | ab   | 4032.2 | a   |
| N2P1K1    | 748.7                           | ab | 1382.6 | ab | 1732.1 | abc  | 3811.9 | ab  |

  

| Phosphorous (mg pl <sup>-1</sup> ) |       |   |       |   |       |   |       |      |
|------------------------------------|-------|---|-------|---|-------|---|-------|------|
| N0P0K0                             | 75.0  | a | 93.7  | a | 136.0 | a | 444.7 | cd   |
| N0P0K1                             | 70.0  | a | 106.0 | a | 154.6 | a | 439.4 | cd   |
| N0P1K0                             | 76.7  | a | 88.3  | a | 146.1 | a | 362.2 | d    |
| N0P1K1                             | 76.3  | a | 94.8  | a | 140.2 | a | 448.9 | cd   |
| N1P0K0                             | 99.1  | a | 108.1 | a | 161.9 | a | 526.6 | bcd  |
| N1P0K1                             | 93.7  | a | 130.8 | a | 199.5 | a | 675.2 | ab   |
| N1P1K0                             | 78.0  | a | 118.7 | a | 181.4 | a | 563.9 | abcd |
| N1P1K1                             | 75.5  | a | 111.5 | a | 164.3 | a | 518.9 | bcd  |
| N2P0K0                             | 102.2 | a | 137.7 | a | 206.9 | a | 615.4 | abc  |
| N2P0K1                             | 79.1  | a | 96.0  | a | 162.8 | a | 548.6 | abcd |
| N2P1K0                             | 96.8  | a | 115.7 | a | 194.6 | a | 748.5 | a    |
| N2P1K1                             | 82.4  | a | 106.0 | a | 177.3 | a | 708.1 | ab   |

  

| Potassium (mg pl <sup>-1</sup> ) |        |   |        |    |        |   |        |     |
|----------------------------------|--------|---|--------|----|--------|---|--------|-----|
| N0P0K0                           | 1286.6 | a | 1817.8 | ab | 1912.9 | a | 1835.0 | c   |
| N0P0K1                           | 1224.3 | a | 1904.3 | ab | 1967.4 | a | 2383.4 | bc  |
| N0P1K0                           | 1202.9 | a | 1523.8 | b  | 1619.6 | a | 1895.3 | c   |
| N0P1K1                           | 1336.5 | a | 1797.2 | ab | 1827.1 | a | 2298.0 | bc  |
| N1P0K0                           | 1743.6 | a | 2003.3 | ab | 2173.1 | a | 2353.5 | bc  |
| N1P0K1                           | 1679.7 | a | 2403.3 | a  | 2614.1 | a | 3374.1 | a   |
| N1P1K0                           | 1267.9 | a | 1781.2 | ab | 1954.9 | a | 2550.1 | abc |
| N1P1K1                           | 1310.7 | a | 1990.8 | ab | 2230.8 | a | 2575.4 | abc |
| N2P0K0                           | 1682.4 | a | 2001.5 | ab | 2225.0 | a | 2853.8 | ab  |
| N2P0K1                           | 1442.9 | a | 1913.6 | ab | 2051.1 | a | 2830.4 | ab  |
| N2P1K0                           | 1640.0 | a | 1814.4 | ab | 1972.0 | a | 2969.1 | ab  |
| N2P1K1                           | 1511.8 | a | 2181.9 | ab | 2374.3 | a | 2969.5 | ab  |

Different letters within each column denotes the significant difference at  $P < 0.05$  by Tukey test

**Table S5.** Means for Nutrient uptake per plant at different growth stages during the crop season at LCB22.

| Treatment | Nitrogen (mg pl <sup>-1</sup> ) |       |        |      |        |    |        |     |
|-----------|---------------------------------|-------|--------|------|--------|----|--------|-----|
|           | -----Growth stage-----          |       |        |      |        |    |        |     |
|           | V6                              |       | VT     |      | R2     |    | R6     |     |
| N0P0K0    | 194.8                           | e     | 777.8  | d    | 888.4  | b  | 1015.4 | cd  |
| N0P0K1    | 262.9                           | cde   | 865    | cd   | 1061.2 | b  | 909.1  | d   |
| N0P1K0    | 279.7                           | bcde  | 776.3  | d    | 1153.7 | ab | 1285.9 | bcd |
| N0P1K1    | 240.3                           | de    | 846.4  | cd   | 1081.7 | b  | 1115.1 | cd  |
| N1P0K0    | 454.9                           | abcde | 1431.3 | abcd | 1510.3 | ab | 1145.2 | cd  |
| N1P0K1    | 526.1                           | abc   | 1096.5 | bcd  | 1663.1 | ab | 1705.3 | abc |
| N1P1K0    | 499.4                           | abcd  | 1136.8 | abcd | 1268.2 | ab | 1409.3 | bcd |
| N1P1K1    | 571                             | a     | 1174.2 | abcd | 1530.7 | ab | 1339.7 | bcd |
| N2P0K0    | 555                             | a     | 1420.1 | abcd | 2050.8 | a  | 2250.3 | a   |
| N2P0K1    | 695.4                           | a     | 1917.1 | a    | 1542.1 | ab | 1799.5 | abc |
| N2P1K0    | 680.7                           | a     | 1541   | abc  | 1657.9 | ab | 1959.8 | ab  |
| N2P1K1    | 544.4                           | ab    | 1686   | ab   | 1685.3 | ab | 1792.5 | abc |

  

| Phosphorous (mg pl <sup>-1</sup> ) |      |     |       |    |       |   |       |   |
|------------------------------------|------|-----|-------|----|-------|---|-------|---|
| N0P0K0                             | 31.9 | d   | 262.9 | ab | 377.3 | a | 321.2 | a |
| N0P0K1                             | 53.2 | bcd | 296.6 | ab | 384   | a | 277.4 | a |
| N0P1K0                             | 53.8 | bcd | 244.9 | ab | 385.1 | a | 413.9 | a |
| N0P1K1                             | 48.2 | cd  | 255   | ab | 487.9 | a | 328.9 | a |
| N1P0K0                             | 70.8 | abc | 302.3 | ab | 402.2 | a | 319.8 | a |
| N1P0K1                             | 86.0 | abc | 178.6 | b  | 437.4 | a | 436.7 | a |
| N1P1K0                             | 79.5 | abc | 271.9 | ab | 407.1 | a | 415.7 | a |
| N1P1K1                             | 82.5 | abc | 222.5 | ab | 509.2 | a | 358.6 | a |
| N2P0K0                             | 79.0 | abc | 242.1 | ab | 429.7 | a | 331.7 | a |
| N2P0K1                             | 97.8 | a   | 318.6 | a  | 341   | a | 396.3 | a |
| N2P1K0                             | 83.0 | ab  | 256.2 | ab | 367.8 | a | 415.1 | a |
| N2P1K1                             | 76.3 | abc | 298.6 | ab | 395.1 | a | 408.8 | a |

  

| Potassium (mg pl <sup>-1</sup> ) |       |      |        |   |        |   |        |   |
|----------------------------------|-------|------|--------|---|--------|---|--------|---|
| N0P0K0                           | 325.4 | d    | 1027.8 | a | 1919.1 | a | 1369.4 | a |
| N0P0K1                           | 537.8 | bcd  | 1914.2 | a | 2006.2 | a | 1186.7 | a |
| N0P1K0                           | 514.2 | cd   | 1501.6 | a | 1912.6 | a | 1406.7 | a |
| N0P1K1                           | 456.6 | cd   | 1554.1 | a | 2155.1 | a | 1344.9 | a |
| N1P0K0                           | 668.1 | abcd | 2006.3 | a | 2644.0 | a | 1398.7 | a |
| N1P0K1                           | 887.9 | ab   | 1429.3 | a | 2675.2 | a | 1992.9 | a |
| N1P1K0                           | 774.6 | abc  | 2152.0 | a | 2453.7 | a | 1620.5 | a |
| N1P1K1                           | 880.5 | ab   | 1493.0 | a | 2900.6 | a | 1502.6 | a |
| N2P0K0                           | 766.4 | abc  | 1700.4 | a | 2554.0 | a | 1583.9 | a |
| N2P0K1                           | 918.5 | a    | 2414.5 | a | 1648.3 | a | 1544.7 | a |
| N2P1K0                           | 718.2 | abc  | 1490.4 | a | 2305.8 | a | 1513.7 | a |
| N2P1K1                           | 748.3 | abc  | 2221.8 | a | 2440.7 | a | 1690.2 | a |

Different letters within each column denotes the significant difference at  $P<0.05$  by Tukey test
